# Supplementary material for: Influenza virus segment 5 (+)RNA - secondary structure and new targets for antiviral strategies
Source: PubMed Central journal article supplement (PMC5678188; doi:10.1038/s41598-017-15317-5), 2017-11-08
Supplement: 41598_2017_15317_MOESM5_ESM.pdf [file 41598_2017_15317_MOESM5_ESM.pdf]

## Supplementary Script File

### **Influenza virus segment 5 (+)RNA - secondary structure and new targets for antiviral strategies**

Marta Soszynska-Jozwiak<sup>1</sup>, Paula Michalak<sup>1</sup>, Walter N. Moss<sup>2</sup>, Ryszard Kierzek<sup>1</sup>, Julita Kesy<sup>1</sup>, Elzbieta Kierzek<sup>1\*</sup>

<sup>1</sup>Institute of Bioorganic Chemistry Polish Academy of Sciences, 61-704 Poznan, Noskowskiego 12/14, Poland

<sup>2</sup>Roy J. Carver Department of Biophysics, Biochemistry and Molecular Biology, Iowa State University, Ames, IA 50011, United States of America

\*Corresponding author: E-mail: [elzbieta.kierzek@ibch.poznan.pl](mailto:elzbieta.kierzek@ibch.poznan.pl), Institute of Bioorganic Chemistry Polish Academy of Sciences, 61-704 Poznan, Noskowskiego 12/14, Poland, Tel.: +4861-853-8503; Fax: +4861-852-0532.

```

#! Usr/bin/perl -w

# Read FASTA file and bracket structure file for the RNA structure. Output a
# count of the pairs in the alignment. This script is useful for searching for
# compensatory changes that support or contradict a hypothetical RNA structure.
#
# Usage:
#
# perl PairCount.pl "Fasta alignment" "bracket structure file" > "output file"
#
# The outfile has pair i j followed by the number of pairs of
# $GC\ $CG\ $AU\ $UA\ $GU\ $UG\ $GA\ $AG\ $AA\ $GG\ $UU\ $CC\ $AC\ $UC\ $CA\ $CU
# that are found at i-j in the alignment
#
# Author: Walter Moss
# e-mail: wmoss@iastate.edu
# Iowa State University

$infile1 = $ARGV[0];

open (INFILE1, "$infile1") || die "Can't open the infile!\n";

my @BigFasta = <INFILE1>;

close(INFILE1) || die "can't close file";

my $N = @BigFasta;

#Put FASTA seqs into a Hash

my %FASTA = ();
my $CurrentSeq = "";

for ($i = 0; $i < $N; $i++) {

    $Line = $BigFasta[$i];
    chomp $Line;

    #Place title and seq into their respective places in the array FASTA
    if (substr($Line, 0, 1) eq ">") {

        my $SeqName = $Line;
        chomp $SeqName;
        $SeqName =~ s/>//g;
        $SeqName =~ s:/-//g;
        $CurrentSeq = $SeqName;

    }

    if ( $Line =~ m/(A|G|C|U|T|Y|R|K|M|B|D|H|V|N|S|W|\?|-)/g && substr($Line, 0, 1) ne ">") {
        $Line =~ s/T/U/g;
        $FASTA{$CurrentSeq} .= $Line;
    }
}

$infile2 = $ARGV[1];
$targetfile2 = "$dir/$infile2";
open (INFILE2, "$targetfile2") || die "Can't open the infile!\n";

```

```

my $Str = <INFILE2>;
close(INFILE2) || die "can't close file";

chomp $Str;
@Str = split("", $Str);

my @Pairs = BasePair (@Str);
my @SeqNames = keys(%FASTA);

# test each position i-j for the types of pair that is found, count pairs

my $Pairlen = @Pairs;

for (my $j=0; $j < $Pairlen; $j += 2) {

    my $LBP = $Pairs[$j];
    my $RBP = $Pairs[$j+1];

    my $AA = 0;
    my $AU = 0;
    my $AG = 0;
    my $AC = 0;
    my $GA = 0;
    my $GU = 0;
    my $GG = 0;
    my $GC = 0;
    my $UA = 0;
    my $UU = 0;
    my $UG = 0;
    my $UC = 0;
    my $CA = 0;
    my $CU = 0;
    my $CG = 0;
    my $CC = 0;

    foreach my $SequenceName (@SeqNames) {

        chomp $SequenceName;
        my $Sequence = $FASTA{$SequenceName};
        chomp $Sequence;
        @Sequence = split("", $Sequence);

        my $LB = $Sequence[$LBP-1];
        my $RB = $Sequence[$RBP-1];

        $LB = $LB . $RB;
        $LB = uc $LB;

        if ($LB =~ /AA/g) { $AA++; }
        if ($LB =~ /AG/g) { $AG++; }
        if ($LB =~ /AC/g) { $AC++; }
        if ($LB =~ /AU/g) { $AU++; }
        if ($LB =~ /GA/g) { $GA++; }
        if ($LB =~ /GG/g) { $GG++; }
        if ($LB =~ /GC/g) { $GC++; }
        if ($LB =~ /GU/g) { $GU++; }
        if ($LB =~ /CA/g) { $CA++; }
        if ($LB =~ /CG/g) { $CG++; }
        if ($LB =~ /CC/g) { $CC++; }
        if ($LB =~ /CU/g) { $CU++; }
    }
}

```

```

    if ($LB =~ /UA/g) { $UA++; }
    if ($LB =~ /UG/g) { $UG++; }
    if ($LB =~ /UC/g) { $UC++; }
    if ($LB =~ /UU/g) { $UU++; }

}

print
"$LBP\t$RBP\t$GC\t$CG\t$AU\t$UA\t$GU\t$UG\t$GA\t$AG\t$AA\t$GG\t$UU\t$CC\t$AC\t$UC\t$CA\t$CU
\n";

}

## BasePair is a subroutine that returns the basepairing pattern of an
## RNA inputted in bracket notation.

sub BasePair {

my @Struc = @_;
my $len = @Struc;

#Initiate two arrays to hold the basepair table, the two are synchronized
my @RtBracket = ();
my @LtBracket = ();

#This array keeps track of how the bps are related via bond-order
my @BondOrder = ();

#initiate a counter for the bonding scheme.
my $BoCount = 0;

#loop through the structure and match the left and right brackets increment the bond order
#for left brackets and decrement for right brackets. this keeps track of the position the first
#L bracket matches the last R bracket and so on. matching Bo #s gives bping pattern.
#single stranded bases are indicated with 0.

for (my $i=0; $i<$len; $i++) {
    if ($Struc[$i] eq "(") {
        #LtBracket[$BoCount] = $i;
        $BoCount++;
        push(@BondOrder, $BoCount);
    }
    elsif ($Struc[$i] eq ")") {
        #RtBracket[$BoCount-1] = $i;
        push(@BondOrder, $BoCount);
        $BoCount--;
    }
}
else {
    push(@BondOrder, 0);
}
}

#Scan through the bonding scheme and generate a bp table
my @BasePairs = ();
my $length = @BondOrder;
my $Test = "";

#print @BondOrder;

#Loop through bo array and pick matching elements to add positions to bp array.

```

```
#Set elements to 0 after scan to avoid double counting!
for (my $j=0; $j<$length; $j++) {
  if ($BondOrder[$j] != 0) {
    my $Test = $BondOrder[$j];
    push(@BasePairs, $j + 1);
    $BondOrder[$j] = 0;
    for (my $k=0; $k<$length; $k++) {
      if ($BondOrder[$k] == $Test) {
        push(@BasePairs, $k + 1);
        $BondOrder[$k] = 0;
      }
    }
  }
}

return (@BasePairs);

}
```
